# Supplementary material for: Degradation of Li/S Battery Electrodes On 3D Current Collectors Studied Using X-ray Phase Contrast Tomography
Source: PubMed Central journal article supplement (PMC4455252; doi:10.1038/srep10921), 2015-06-04
Supplement: srep10921-s1.pdf [file srep10921-s1.pdf]

## Degradation of Li/S Battery Electrodes On 3D Current Collectors Studied Using X-ray Phase

### Contrast Tomography

L. Zielke<sup>1\*</sup>, C. Barchasz<sup>2</sup>, S. Waluś<sup>2,3,4</sup>, F. Alloin<sup>3,4</sup>, J.-C. Leprêtre<sup>3,4</sup>, A. Spettl<sup>5</sup>, V. Schmidt<sup>5</sup>, A. Hilger<sup>6</sup>, I. Manke<sup>6</sup>, J. Banhart<sup>6</sup>, R. Zengerle<sup>1,7</sup> and S. Thiele<sup>1,8</sup>

In the supplementary Figure 1s we show the sulphur volume fraction in the whole cathode thickness from above. The mentioned spreading of particles can be seen from b) to d).

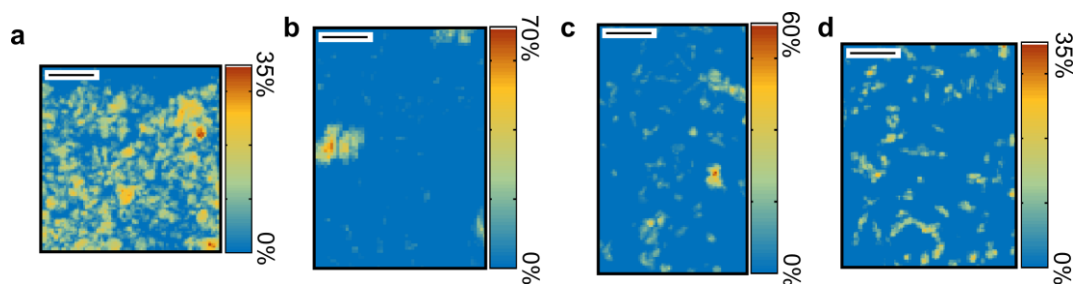

**Figure 1s** Projected sulphur volume fractions in the four investigated positive electrodes, as seen from above. (a) uncycled electrode, (b) after 1 cycle, (c) after 2 cycles and (d) after 10 cycles. One pixel represents the volume fraction of sulfur in a corresponding volume of  $8.8 \mu\text{m} \times 8.8 \mu\text{m} \times$  local thickness of the cathode. The spreading of sulphur material during cycling can be seen (b-d). The scale bar represents  $200 \mu\text{m}$ .
